# Supplementary material for: Regulation of Alcohol and Acetaldehyde Metabolism by a Mixture of Lactobacillus and Bifidobacterium Species in Human
Source: MDPI journal article supplement (doi:10.3390/nu13061875), 2021-05-30
Supplement: s1 [file s1]

## Supplementary materials

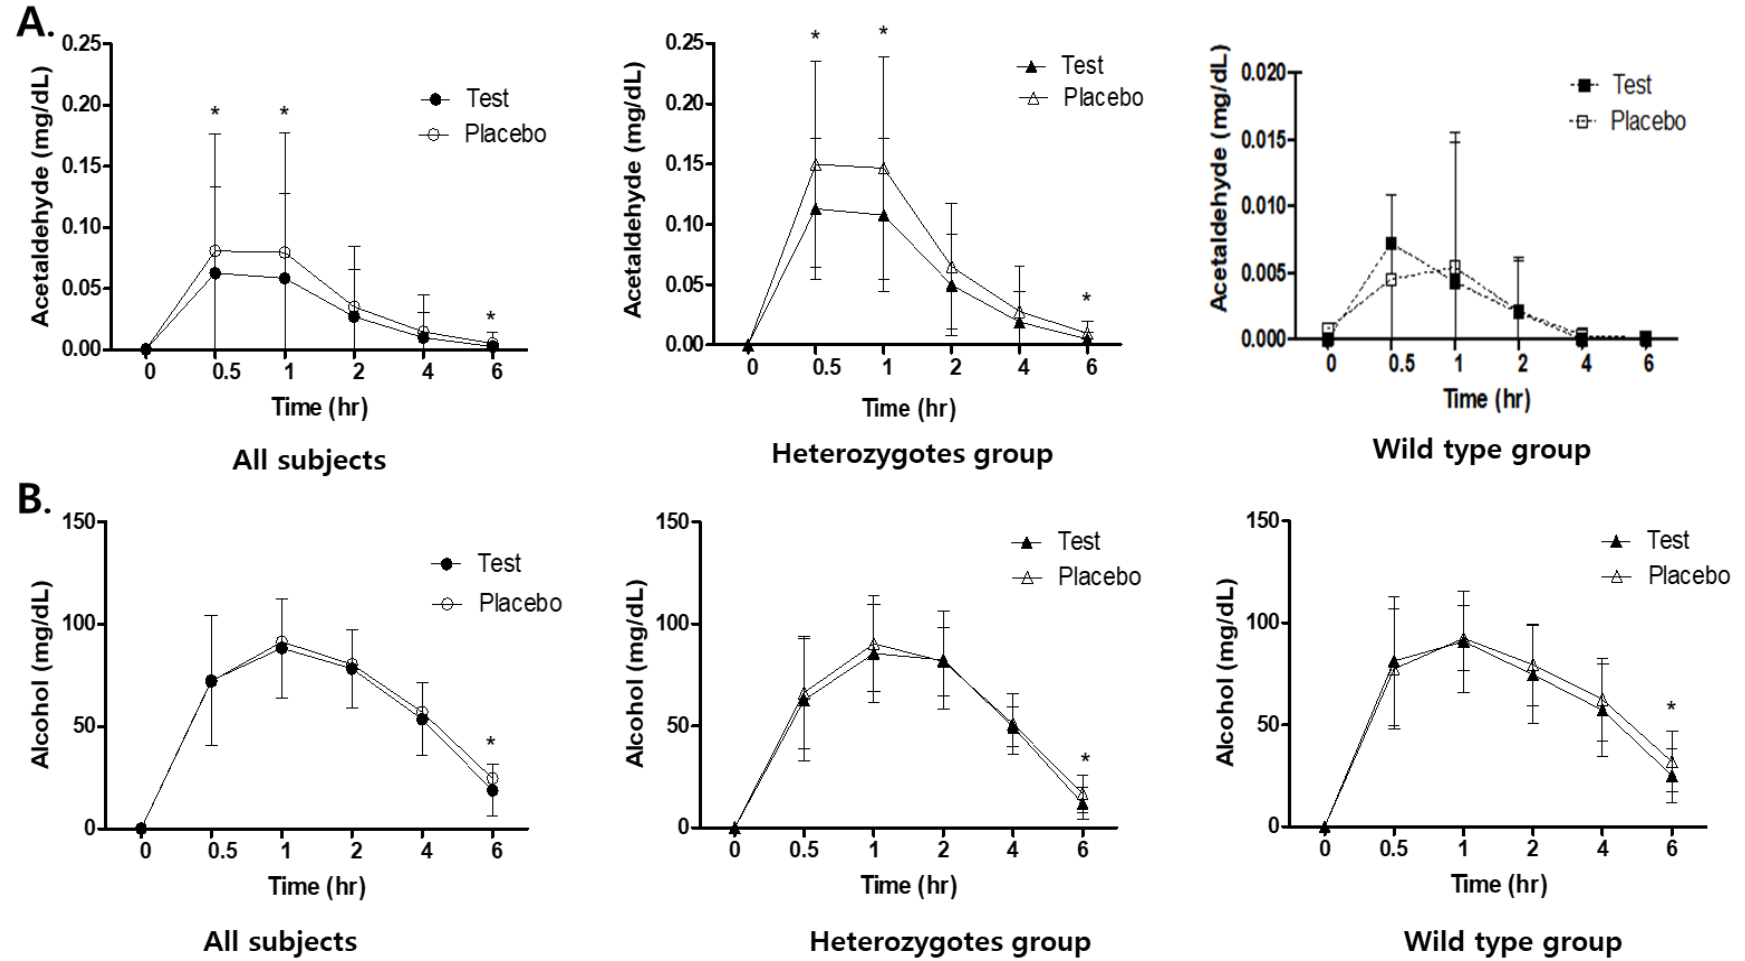

**Figure S1.** Changes in blood acetaldehyde (A) and alcohol (B) concentrations flowing alcohol challenge test after 15 days of supplementation. \*:  $p < 0.05$

**Table S1.** Score of alcohol hangover questionnaire after 15 days of supplementation.

| Hangover symptom index                                    | Wild type ( <i>ALDH2</i> *1/*1) |                         |                               | Heterozygote ( <i>ALDH2</i> *2/*1) |                         |                               | Total group                   |                         |                               |
|-----------------------------------------------------------|---------------------------------|-------------------------|-------------------------------|------------------------------------|-------------------------|-------------------------------|-------------------------------|-------------------------|-------------------------------|
|                                                           | Duolac ProAP4 group<br>(n=19)   | Placebo group<br>(n=19) | <i>p</i> -value <sup>1)</sup> | Duolac ProAP4 group<br>(n=21)      | Placebo group<br>(n=21) | <i>p</i> -value <sup>1)</sup> | Duolac ProAP4 group<br>(n=40) | Placebo group<br>(n=40) | <i>p</i> -value <sup>1)</sup> |
| Excessive thirst                                          | 2.05±1.03                       | 2.16±1.07               | 0.578                         | 2.67±1.11                          | 2.76±0.83               | 0.680                         | 2.38±1.10                     | 2.48±0.99               | 0.500                         |
| Sleepiness                                                | 2.84±1.12                       | 2.89±1.29               | 0.841                         | 3.62±1.16                          | 3.71±0.85               | 0.693                         | 3.25±1.19                     | 3.33±1.14               | 0.667                         |
| Headache                                                  | 2.63±1.34                       | 2.68±1.29               | 0.790                         | 2.76±0.94                          | 2.86±1.15               | 0.715                         | 2.70±1.14                     | 2.78±1.21               | 0.645                         |
| Dizziness                                                 | 1.84±1.07                       | 2.42±1.07               | 0.053                         | 2.57±1.03                          | 2.52±1.12               | 0.853                         | 2.23±1.10                     | 2.48±1.09               | 0.201                         |
| Vomiting, a sense of helplessness                         | 1.37±0.83                       | 1.47±0.70               | 0.630                         | 1.81±0.98                          | 1.62±0.80               | 0.258                         | 1.60±0.93                     | 1.55±0.75               | 0.711                         |
| Lack of energy                                            | 1.68±0.58                       | 1.89±0.88               | 0.360                         | 2.14±1.20                          | 2.38±1.07               | 0.234                         | 1.93±0.97                     | 2.15±1.00               | 0.130                         |
| Abdominal pain                                            | 1.05±0.23                       | 1.05±0.23               | >.999                         | 1.19±0.40                          | 1.29±0.56               | 0.493                         | 1.13±0.33                     | 1.18±0.45               | 0.534                         |
| Diarrhea                                                  | 1.05±0.23                       | 1.32±0.67               | 0.135                         | 1.05±0.22                          | 1.14±0.48               | 0.428                         | 1.05±0.22                     | 1.23±0.58               | 0.090                         |
| Concentration difficulty                                  | 1.74±0.87                       | 1.95±0.71               | 0.331                         | 2.00±1.22                          | 2.24±1.14               | 0.366                         | 1.88±1.07                     | 2.10±0.96               | 0.183                         |
| More sensitive to irritation than usual (light and sound) | 1.26±0.45                       | 1.32±0.48               | 0.667                         | 1.33±0.66                          | 1.62±0.92               | 0.162                         | 1.30±0.56                     | 1.48±0.75               | 0.147                         |
| Sleep difficulty                                          | 1.32±0.82                       | 1.16±0.50               | 0.380                         | 1.05±0.22                          | 1.24±0.54               | 0.104                         | 1.18±0.59                     | 1.20±0.52               | 0.812                         |
| Sweat more than usual (sticky sweat)                      | 1.42±0.61                       | 1.16±0.37               | 0.056                         | 1.48±0.98                          | 1.33±0.66               | 0.576                         | 1.45±0.81                     | 1.25±0.54               | 0.173                         |

|                                               |            |            |       |             |             |       |             |             |       |
|-----------------------------------------------|------------|------------|-------|-------------|-------------|-------|-------------|-------------|-------|
| Melancholy                                    | 1.16±0.69  | 1.00±0.00  | 0.331 | 1.05±0.22   | 1.10±0.30   | 0.576 | 1.10±0.50   | 1.05±0.22   | 0.570 |
| Memory disconnection                          | 1.16±0.37  | 1.53±1.12  | 0.185 | 1.05±0.22   | 1.14±0.36   | 0.329 | 1.10±0.30   | 1.33±0.83   | 0.107 |
| Heart palpitations                            | 1.32±0.58  | 1.11±0.32  | 0.163 | 3.24±1.04   | 2.62±1.36   | 0.024 | 2.33±1.29   | 1.90±1.26   | 0.008 |
| Zone (nausea = feels like vomiting is urgent) | 1.26±0.56  | 1.32±0.58  | 0.749 | 1.57±0.81   | 1.57±0.98   | >.999 | 1.43±0.71   | 1.45±0.81   | 0.838 |
| Elated mood                                   | 2.00±1.00  | 1.79±0.92  | 0.494 | 2.57±1.21   | 2.05±1.12   | 0.018 | 2.30±1.14   | 1.93±1.02   | 0.042 |
| Blush of the face                             | 1.63±0.90  | 1.58±0.84  | 0.772 | 4.00±1.14   | 3.81±1.08   | 0.446 | 2.88±1.57   | 2.75±1.48   | 0.418 |
| Body warms up                                 | 1.79±0.85  | 1.63±0.83  | 0.604 | 3.52±1.29   | 3.29±1.15   | 0.309 | 2.70±1.40   | 2.50±1.30   | 0.282 |
| Shortness of breath                           | 1.11±0.32  | 1.00±0.00  | 0.163 | 2.57±1.29   | 2.33±1.06   | 0.204 | 1.88±1.20   | 1.70±1.02   | 0.090 |
| Symptom index (20)*                           | 31.68±8.09 | 32.42±6.99 | 0.752 | 43.24±10.14 | 42.62±10.46 | 0.734 | 37.75±10.82 | 37.78±10.26 | 0.986 |
| Symptom index (13)#                           | 21.26±5.09 | 22.84±5.25 | 0.305 | 24.71±6.01  | 25.71±6.22  | 0.395 | 23.08±5.79  | 24.35±5.89  | 0.174 |
| Symptom index (7)†                            | 12.21±3.14 | 12.89±3.49 | 0.407 | 14.76±4.35  | 15.52±3.83  | 0.339 | 13.55±3.99  | 14.28±3.86  | 0.197 |

Values are presented as mean ± SD. <sup>1)</sup> Analyzed using paired *t*-test (compared between groups) \* Excessive thirst, sleepiness, headache, dizziness, vomiting, a sense of helplessness, lack of energy, abdominal pain, diarrhea, concentration difficulty, more sensitive to irritation than usual (light and sound), sleep difficulty, sweat more than usual (sticky sweat), melancholy, memory disconnection, heart palpitations Zone (nausea = feels like vomiting is urgent), elated mood, blush of the face, body warms up, shortness of breath. # Excessive thirst, sleepiness, headache, dizziness, vomiting, a sense of helplessness, abdominal pain, diarrhea, concentration difficulty, more sensitive to irritation than usual (light and sound), sweat more than usual (sticky sweat), melancholy, memory disconnection. † Excessive thirst, sleepiness, headache, dizziness, a sense of helplessness, concentration difficulty, heart palpitations, zone (nausea = feels like vomiting is urgent).
